# Supplementary material for: Glycation of Tie-2 Inhibits Angiopoietin-1 Signaling Activation and Angiopoietin-1-Induced Angiogenesis
Source: MDPI journal article supplement (doi:10.3390/ijms23137137), 2022-06-27
Supplement: s1 [file s1]

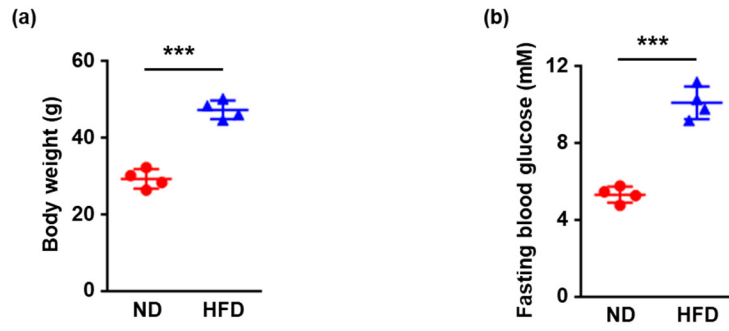

**Figure S1. HFD induced obesity and hyperglycemia.** 8 weeks old male C57BL/6J mice were fed with a HFD or a ND diet for 16 weeks. The body weight (a) and the fasting blood glucose (b) were detected before the aortae were separated. \*\*\* $p < 0.01$ . Error bar represents the standard deviation and  $p$  value was generated by  $t$  test.

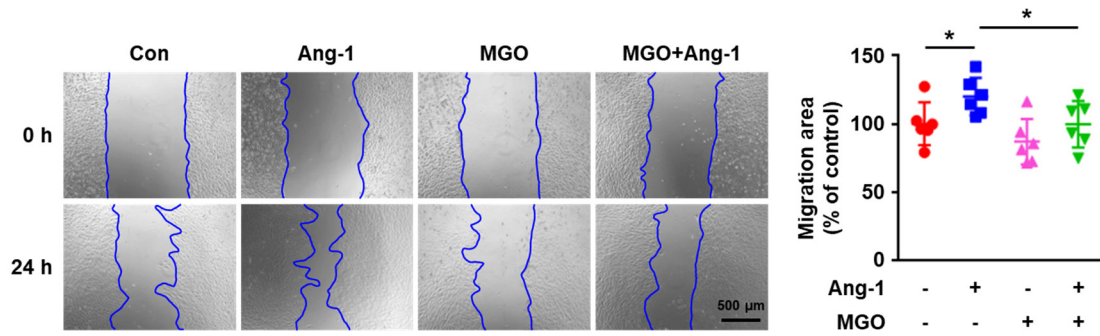

**Figure S2. MGO inhibits Ang-1-induced endothelial cell migration.** HUVECs were seeded onto 24-well plates, allowed to grown to 90% confluence and exposed to MGO (100  $\mu$ M) for 24 h. Then the cells were scratched with a 200  $\mu$ L pipette tip, followed by stimulation with Ang-1 (200 ng/mL) for 24 h. Photomicrographs were taken immediately after the scratch and after Ang-1 treatment. Representative images of 6 independent experiments are shown. The cell migration area was calculated and quantitative assessment was performed. \* $p < 0.05$ . Error bar represents the standard deviation and  $p$  value was generated by One-way ANOVA followed by post hoc comparison.
